# Supplementary material
Source: PubMed Central journal article supplement (PMC2989154)
Supplement: NIHMS142996-supplement-Suppdata02.pdf [file NIHMS142996-supplement-Suppdata02.pdf]

*Balakrishnan et al.*

## Molecular Profiling of the 'Plexinome' in melanoma and pancreatic cancer

### SUPPORTING INFORMATION

#### **SUPP. METHODS**

##### **Copy number analysis**

Quantitative real-time TaqMan PCR was performed to determine copy number of all the plexins in melanoma and PDAC tumors. Target sequences were designed for all nine plexins and the respective Custom TaqMan® Assays were ordered from Applied Biosystems (Applied Biosystems, Foster City, CA). Two assays were designed and ordered for *PLXNA4*. The probes were labeled with the reporter dye 6-carboxyfluorescein (FAM) and Non-fluorescent quencher (NFQ), at the 5'- and 3'- ends, respectively. PCR was performed in a 384-well clear optical reaction plate using the ABI Prism 7900HT Sequence detection system (Applied Biosystems, Foster City, CA). All reactions were performed in triplicate. The average *PLXN* copy number was calculated from the differences in the threshold amplification cycles between *PLXN* and RNaseP. The diploid retinal pigmented epithelial cell line (RPE) was used as a normal control. Copy number was determined from the PCR cycle number (Ct) at which the fluorescence from the DNA reaches a threshold amount of fluorescence above the background. Calculations were performed according to the  $\delta\delta Ct$  method (Livak et al., 2001). The Ct values for each set of triplicates were averaged. The Ct of the reference was subtracted from the Ct for each locus to obtain the  $\delta Ct$  [ $\delta Ct = Ct(\text{plexin}) - Ct(\text{RNaseP})$ ].  $\delta Ct$  values were determined for loci in tumor samples and normal diploid genomic DNA (RPE). The relative copy number of a locus is tumor DNA to normal DNA =  $2^{-\delta\delta Ct}$ , where  $\delta\delta Ct = \delta Ct(\text{tumor}) - \delta Ct(\text{normal})$ . Copy numbers <1.5, 1.5 to 3.0, and >3.0 copies per sample were cutoff values to indicate decreased, normal, and increased *PLXN* copy numbers respectively (Takano et al., 2005).

##### **Ectopic expression of plexins in mammalian cells**

cDNAs encoding human plexins were modified by site directed mutagenesis (Quickchange II XL kit, Stratagene) to introduce the nucleotide mutations identified in human tumors. The R539H mutation was introduced in a construct encoding the extracellular and transmembrane domain of human-PLXNB3, to be used for binding assays. The p.H1736Y mutation of *PLXNA4* was introduced in a construct expressing the transmembrane and cytoplasmic domain of the human receptor, to be used for testing the cell collapsing activity. The latter construct was designed by analogy to the constitutively active constructs previously generated for *PLXNA1* and *PLXNB1* (Takahashi et al., 2001; Oinuma et al., 2004) and included the coding sequence starting from amino acid residue Alanine at 1214. The p.E1154K mutation of *PLXNA4* was introduced in a construct encoding full size mouse receptor (as the human complete cDNA was not available), and mouse secreted Sema6A-AP (kindly provided by H. Fujisawa, Japan) was used as probe in binding assays (see below). Ectopic expression of wild type or mutated plexins in COS and MDA-MB435 cells was achieved by DNA transfection. Protein expression was assessed by immunoblotting, according to standard methods. Anti-VSV-G and anti-Myc-tag antibodies were from Sigma.

##### **Functional assays to analyze mutated plexins**

Semaphorin binding assays were performed as previously described (Tamagnone et al., 1999). Briefly, COS cells transfected to express plexin constructs were incubated with 2nM recombinant secreted Sema5A fused to alkaline-phosphatase (Sema5A-AP)(Artigiani et al., 2004). Cell-bound semaphorin was eventually revealed by incubating with NBT/BCIP alkaline phosphatase substrate (Promega).

Cellular collapse assays were performed as previously described (Barberis et al., 2004). Briefly, COS cells transfected to express constitutively active plexin constructs were seeded on fibronectin-coated glass coverslips and subjected to immunofluorescence analysis. F-actin was stained with fluorescein-labeled phalloidin (phalloidin-FITC, Sigma) to provide counterstaining. Digital images were acquired, using a Zeiss Axyoskop microscope equipped with Biorad Confocal Imaging System. Collapsed cells were identified for having a diameter equal or less than 30  $\mu\text{m}$ .

Cell migration assays were performed as previously described (Barberis et al., 2004). Briefly, the lower side of the semipermeable membrane of Transwell inserts (Costar) was previously coated with 10 $\mu\text{g/ml}$  fibronectin (Sigma).  $1 \times 10^5$  MDA-MB435 cells were then seeded in the upper chamber of the insert and let spontaneously migrate through the pores of the membrane for 16 hours. The migrated cells found on the lower side of the filter were fixed, stained with crystal violet, photographed and counted using Metamorph software.

**SUPP. TABLES:****Supp. Table S1. A summary of information on the nine known human plexins.**

| Gene             | Gene Symbol   | Synonyms/Description                                                        | No. Exons | Chromosome |
|------------------|---------------|-----------------------------------------------------------------------------|-----------|------------|
| <b>PLEXIN A1</b> | <i>PLXNA1</i> | Plexin-A1 precursor (Semaphorin receptor NOV), NOV, PLEXIN-A1, PLXN1        | 31        | 3q21.3     |
| <b>PLEXIN A2</b> | <i>PLXNA2</i> | RP11-328D5.3, FLJ11751, FLJ30634, KIAA0463, OCT, PLXN2                      | 32        | 1q32.2     |
| <b>PLEXIN A3</b> | <i>PLXNA3</i> | XX-FW81657B9.3, 6.3, HSSEXGENE, PLEXIN-A3, PLXN3, PLXN4, SEX, XAP-6         | 33        | Xq28       |
| <b>PLEXIN A4</b> | <i>PLXNA4</i> | DKFZp566O0546, FLJ35026, FLJ38287, PLEXA4, PLXNA4                           | 31        | 7q32.3     |
|                  |               | DKFZp434G0625, DKFZp434G0625PRO34003, FAYV2820, PRO34003                    | 5         |            |
| <b>PLEXIN B1</b> | <i>PLXNB1</i> | KIAA0407, PLEXIN-B1, PLXN5, SEP                                             | 36        | 3p21.31    |
| <b>PLEXIN B2</b> | <i>PLXNB2</i> | KIAA0315, MM1, Nbla00445, PLEXB2, dJ402G11.3                                | 35        | 22q13.33   |
| <b>PLEXIN B3</b> | <i>PLXNB3</i> | PLEXB3, PLEXR, PLXN6                                                        | 36        | Xq28       |
| <b>PLEXIN C1</b> | <i>PLXNC1</i> | CD232, PLXN-C1, VESPR (Virus Encoded Semaphorin Protein Receptor), KIAA0620 | 31        | 12q23.3    |
| <b>PLEXIN D1</b> | <i>PLXND1</i> | KIAA0620, MGC75353, PLEXD1                                                  | 37        | 3q21.3     |

The total number of exons in each gene and the location of the plexins in the genome are tabulated. *PLXNA4* genomic sequence had been initially reported in public databases as split into two records corresponding to adjacent loci (*PLXNA4-A* and *PLXNA4-B*).

**Supp. Table S2. Information on tumor samples.**

| Tumor type      | Sample                                  | Age | Gender | Grade        | Tumor source         | Tumor DNA source    | Matched Normal source          |          |
|-----------------|-----------------------------------------|-----|--------|--------------|----------------------|---------------------|--------------------------------|----------|
| <b>Melanoma</b> | 2A                                      | 51  | M      | IV           | nodal metastasis     | short term cultures | EBV immortalized B lymphocytes |          |
|                 | 4A                                      | 55  | F      | IIB/IIIC     | primary tumour       | short term cultures | EBV immortalized B lymphocytes |          |
|                 | 5A                                      | 36  | F      | IIIB/IIIC    | nodal metastasis     | short term cultures | EBV immortalized B lymphocytes |          |
|                 | 6A                                      | 43  | M      | IIIC         | nodal metastasis     | short term cultures | EBV immortalized B lymphocytes |          |
|                 | 7A                                      | 22  | F      | IIIB/IIIC    | nodal metastasis     | short term cultures | EBV immortalized B lymphocytes |          |
|                 | 8A                                      | 55  | M      | IIIC         | nodal metastasis     | short term cultures | EBV immortalized B lymphocytes |          |
|                 | 9A                                      | 53  | M      | IIIB/IIIC    | nodal metastasis     | short term cultures | EBV immortalized B lymphocytes |          |
|                 | 10A                                     | 52  | M      | IIIC         | nodal metastasis     | short term cultures | EBV immortalized B lymphocytes |          |
|                 | 11A                                     | 69  | M      | IIIA/IIIB    | nodal metastasis     | short term cultures | EBV immortalized B lymphocytes |          |
|                 | 12A                                     | 70  | M      | IV           | cutaneous metastasis | short term cultures | EBV immortalized B lymphocytes |          |
|                 | 13A                                     | 59  | F      | IV           | cutaneous metastasis | short term cultures | EBV immortalized B lymphocytes |          |
|                 | 14A                                     | 56  | M      | III          | nodal metastasis     | short term cultures | EBV immortalized B lymphocytes |          |
|                 | 15A                                     | 30  | M      | IV-M1c       | colon metastasis     | short term cultures | EBV immortalized B lymphocytes |          |
|                 | 16A                                     | 45  | F      | IIIB/IIIC    | nodal metastasis     | short term cultures | EBV immortalized B lymphocytes |          |
|                 | 17A                                     | 51  | M      | IV           | cutaneous metastasis | short term cultures | EBV immortalized B lymphocytes |          |
|                 | 18A                                     | 68  | M      | IV           | cutaneous metastasis | short term cultures | blood                          |          |
|                 | 19A                                     | 71  | F      | IIIC T4aN3M0 | cutaneous metastasis | short term cultures | EBV immortalized B lymphocytes |          |
|                 | 20A                                     | 24  | M      | IIIC         | nodal metastasis     | short term cultures | EBV immortalized B lymphocytes |          |
|                 | 21A                                     | 36  | F      | IIIB/IIIC    | nodal metastasis     | short term cultures | EBV immortalized B lymphocytes |          |
|                 | 22A                                     | 39  | F      | IIIC         | nodal metastasis     | short term cultures | blood                          |          |
|                 | 23A                                     | 56  | M      | IV-M1c       | lung metastasis      | short term cultures | EBV immortalized B lymphocytes |          |
|                 | 24A                                     | 49  | M      | IV           | cutaneous metastasis | short term cultures | EBV immortalized B lymphocytes |          |
|                 | 25A                                     | 49  | M      | IV           | cutaneous metastasis | short term cultures | EBV immortalized B lymphocytes |          |
|                 | 26A                                     | 62  | F      | IV-M1a       | nodal metastasis     | short term cultures | EBV immortalized B lymphocytes |          |
|                 | <b>Pancreatic Ductal Adenocarcinoma</b> | 360 | 76     | F            | T3N0/ G2             | primary tumour      | xenograft                      | duodenum |
|                 |                                         | 362 | 54     | M            | T3N1b/G3             | primary tumour      | xenograft                      | pancreas |
| 369             |                                         | 61  | M      | T3N0/G2      | primary tumour       | xenograft           | not available                  |          |
| 370             |                                         | 52  | F      | T3N1b/G2     | primary tumour       | xenograft           | EBV immortalized B lymphocytes |          |
| 371             |                                         | 57  | M      | T3N0/G3      | primary tumour       | xenograft           | duodenum                       |          |
| 374             |                                         | 62  | F      | T3N0/G3      | primary tumour       | xenograft           | pancreas                       |          |
| 375             |                                         | 59  | M      | T3N1a/G3     | primary tumour       | xenograft           | EBV immortalized B lymphocytes |          |
| 377             |                                         | 52  | M      | T3N1a/G2     | primary tumour       | xenograft           | pancreas                       |          |
| 379             |                                         | 62  | F      | T3N1/G2      | primary tumour       | xenograft           | spleen                         |          |
| 380             |                                         | 57  | M      | T3N1a/G2     | primary tumour       | xenograft           | duodenum                       |          |
| 382             |                                         | 44  | F      | T3N0/G2      | primary tumour       | xenograft           | duodenum                       |          |
| 384             |                                         | 69  | F      | T3N0/G2      | primary tumour       | xenograft           | spleen                         |          |

Clinical information on the patient and the tumor source are indicated. In addition, the method of tumor propagation prior to DNA extraction is indicated as “tumor DNA source”.

**Supp. Table S3. Cell line names and types used for copy number determination of *PLXNA4*.**

| Cell Line   | Origin                                           |
|-------------|--------------------------------------------------|
| RPE         | Retinal pigmental epithelial                     |
| MET5A       | normal human mesothelial cells                   |
| MCF10A      | breast epithelium (immoratized, not transformed) |
| MCF7        | breast adenocarcinoma                            |
| T47D        | breast adenocarcinoma                            |
| SKBR3 WT    | breast adenocarcinoma                            |
| Hs 578T     | breast ductal carcinoma*                         |
| HCC1008     | breast carcinoma*                                |
| HCC1954     | breast ductal carcinoma*                         |
| HCC38       | breast ductal carcinoma*                         |
| HCC1143     | breast ductal carcinoma*                         |
| HCC1187     | breast ductal carcinoma*                         |
| HCC1395     | breast ductal carcinoma*                         |
| HCC1599     | breast ductal carcinoma*                         |
| HCC1937     | breast ductal carcinoma*                         |
| HCC2157     | breast ductal carcinoma*                         |
| HCC2218     | breast ductal carcinoma*                         |
| Hs 574.T    | breast ductal carcinoma*                         |
| MDA MB-231  | breast adenocarcinoma                            |
| MDA MB-435  | melanoma                                         |
| LOX IMVI    | malignant amelanotic melanoma                    |
| A431        | skin, squamous cell carcinoma                    |
| SCC68       | squamous cell carcinoma, head and neck           |
| PCI13       | squamous cell carcinoma, head and neck           |
| PCI4a       | squamous cell carcinoma, head and neck           |
| CAPAN-1     | pancreatic adenocarcinoma                        |
| BXPC3       | pancreatic adenocarcinoma                        |
| SUIT-2      | pancreatic carcinoma                             |
| DIFI WT     | colorectal adenocarcinoma                        |
| LOVO WT     | colorectal adenocarcinoma                        |
| HCT116      | colorectal adenocarcinoma                        |
| HT29        | colorectal adenocarcinoma                        |
| DLD1        | colon carcinoma                                  |
| SW480       | colon adenocarcinoma                             |
| U2-WT       | osteosarcoma                                     |
| KHOS        | osteosarcoma                                     |
| SAOS        | osteosarcoma                                     |
| MNNG/HOS    | osteosarcoma                                     |
| MG 63       | osteosarcoma                                     |
| SKNSH       | neuroblastoma                                    |
| LAN-5       | neuroblastoma                                    |
| IMR5        | neuroblastoma                                    |
| TOV21G      | ovary, malignant adenocarcinoma                  |
| NIH:OVCAR-3 | ovarian carcinoma                                |
| OV90        | ovary, malignant papillary serous adenocarcinoma |
| PC 3        | prostate adenocarcinoma                          |
| DU 145      | prostate carcinoma                               |

| Cell Line | Origin                      |
|-----------|-----------------------------|
| HEPG2     | hepatocellular carcinoma    |
| Hela      | cervical adenocarcinoma     |
| U937      | leukemic monocyte lymphoma  |
| K562      | chronic myelocytic leukemia |
| GTL16     | gastric carcinoma           |
| A549      | lung adenocarcinoma         |
| NCI-H1395 | lung carcinoma*             |
| NCI-H1437 | lung carcinoma*             |
| NCI-H2009 | lung carcinoma*             |
| NCI-H2122 | lung carcinoma*             |
| NCI-H2087 | lung carcinoma*             |
| NCI-H2171 | lung carcinoma*             |
| NCI-H2195 | lung carcinoma*             |
| NCI-H1184 | lung carcinoma*             |
| NCI-H209  | lung carcinoma*             |
| NCI-H128  | lung carcinoma*             |
| NCI-H2126 | lung carcinoma*             |
| NCI-H2107 | lung carcinoma*             |

\* These cell lines were directly obtained from ATCC.

**Supp. Table S4, containing sequencing primers, is provided as a separate \*.xls file due to its large size.**

**SUPP. FIGURES:**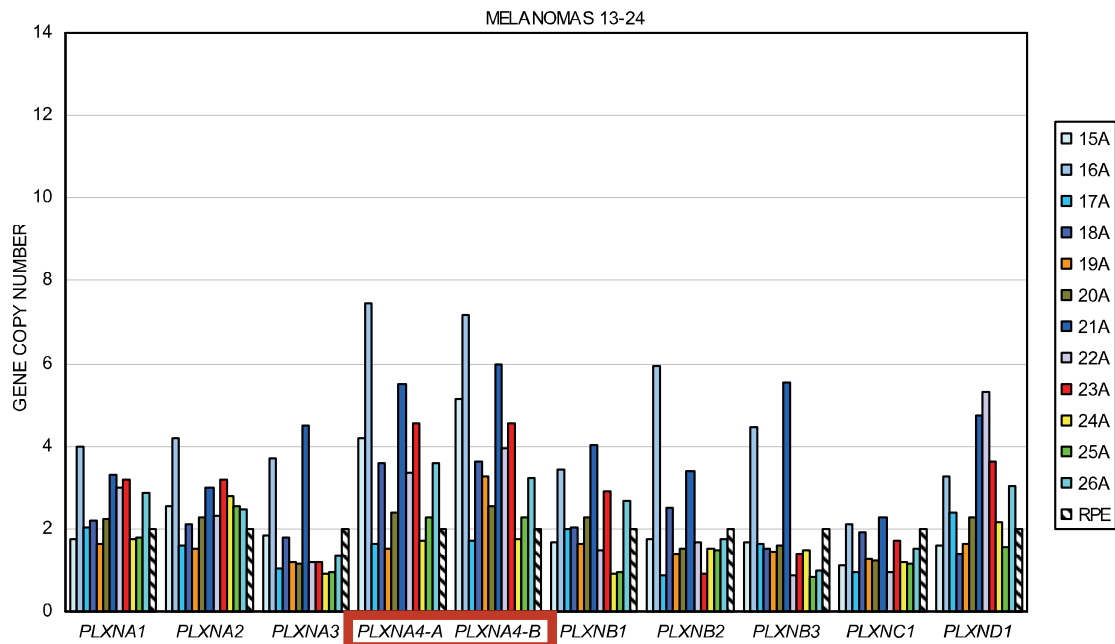**Supp. Figure S1. Plexin gene copy number analysis in melanoma.**

Quantitative Real Time PCR analysis with plexin-specific probes of the genomic DNA derived from twelve of the 24 melanomas (the same samples that we sequenced for mutational profiling). Copy number results for the first 12 melanoma samples are shown in Fig.1A. The nine plexins are indicated on the X-axis (A1 through D1); two distinct probes were used to analyze *PLXNA4*. The Y-axis shows copy numbers after normalization with control DNA (RPE cells). Gene copy numbers below 1.5 and above 3 are normally considered as aberrant.

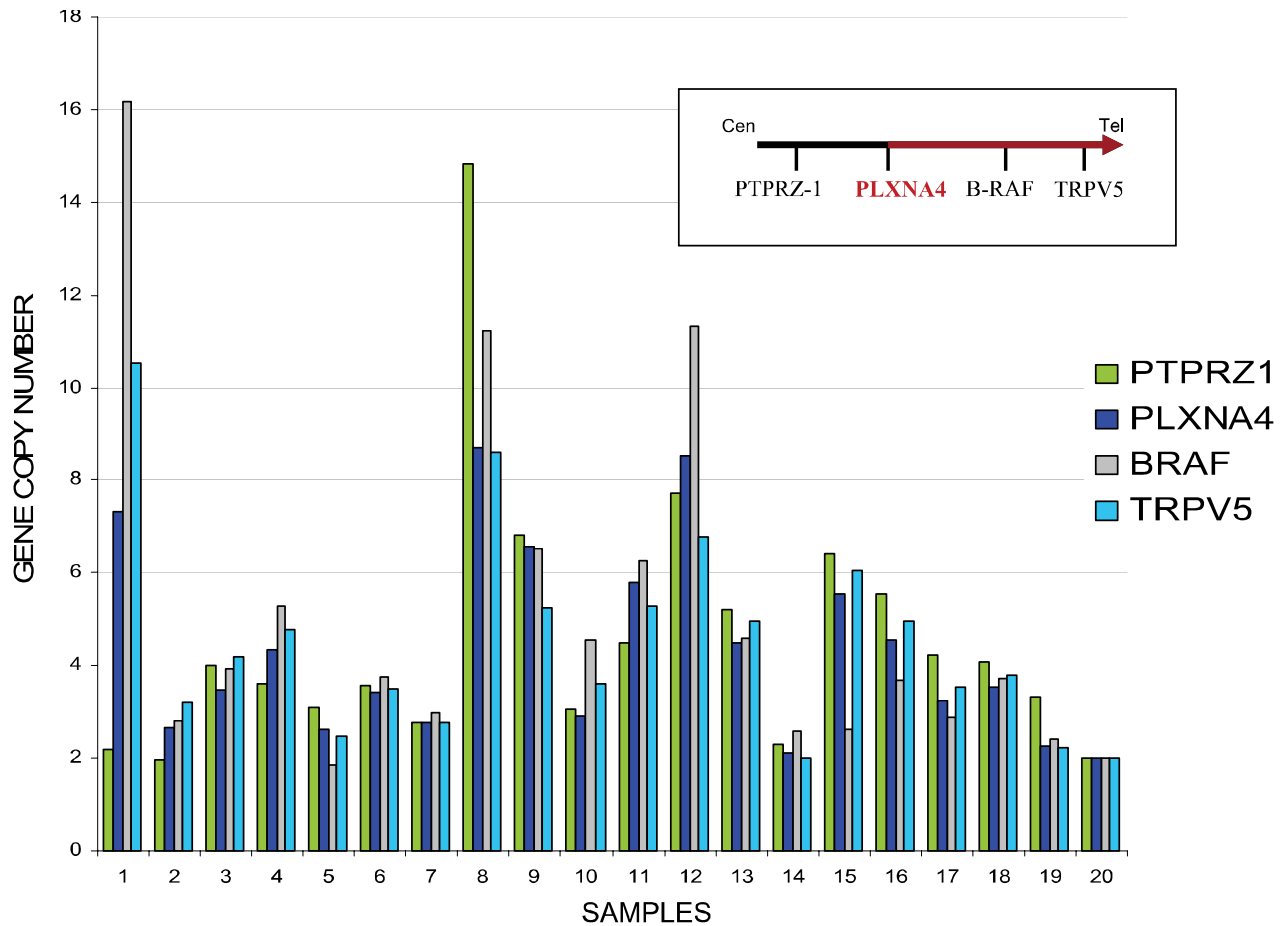

**Supp. Figure S2. Delineation of *PLXNA4*-containing amplicon.**

To delineate the outermost limits of the *PLXNA4*-containing amplicon in chr. 7q found in melanomas, we determined gene copy numbers of *PLXNA4* along with those of flanking genes *PTPRZ1* and *TRPV5* (located 10Mb upstream and downstream, respectively). In addition, copy number of *BRAF*, located about 8Mb downstream of *PLXNA4*, was also analysed. On the Y-axis, values indicate gene copy numbers, measured by Quantitative Real Time PCR in twenty melanoma samples presenting *PLXNA4* gene amplification (distributed on X-axis).



**PLXN A4**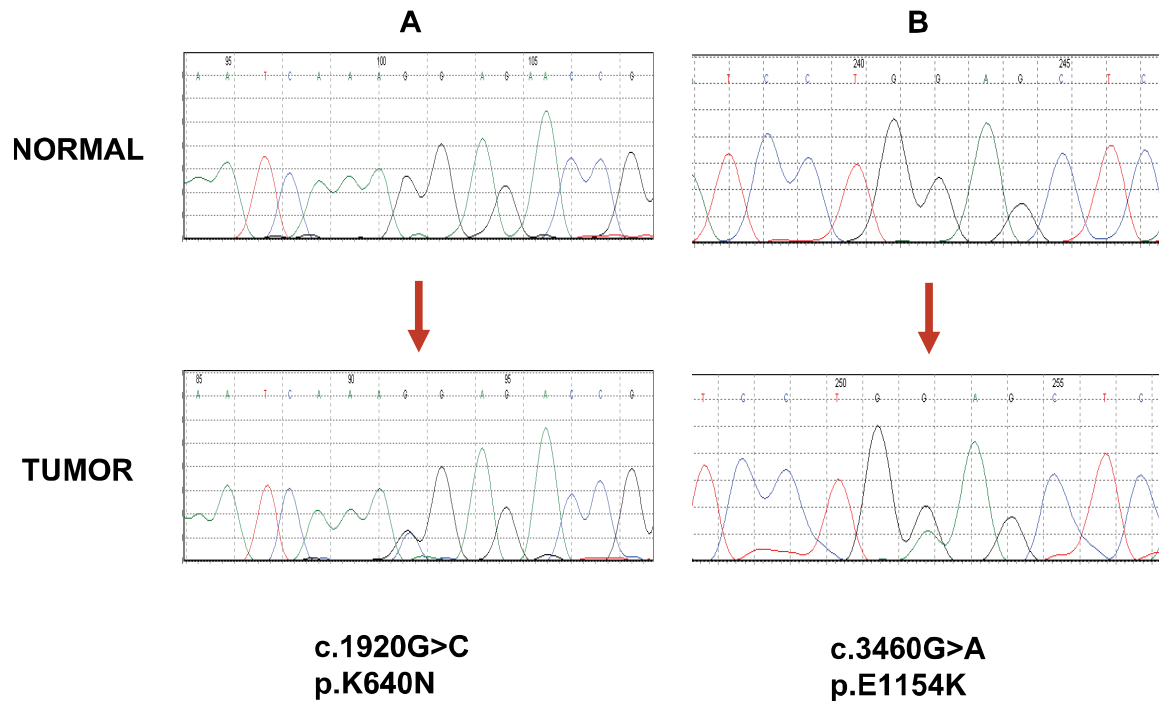**Supp. Figure S3. Somatic mutations in *PLXNA4*.**

Chromatograms of the two somatic mutations found in *PLXNA4* in two different melanomas. A third mutation of the same gene, found in a distinct sample is shown in Fig. 2 (main text). In each case, the lower chromatogram belongs to a tumor sample, and the upper chromatogram is from the matched normal. Arrows indicate the location of missense somatic mutations, and the nucleotide and amino acid alterations are indicated below the traces. Numbers above the sequences are part of the software output.

**PLXN C1**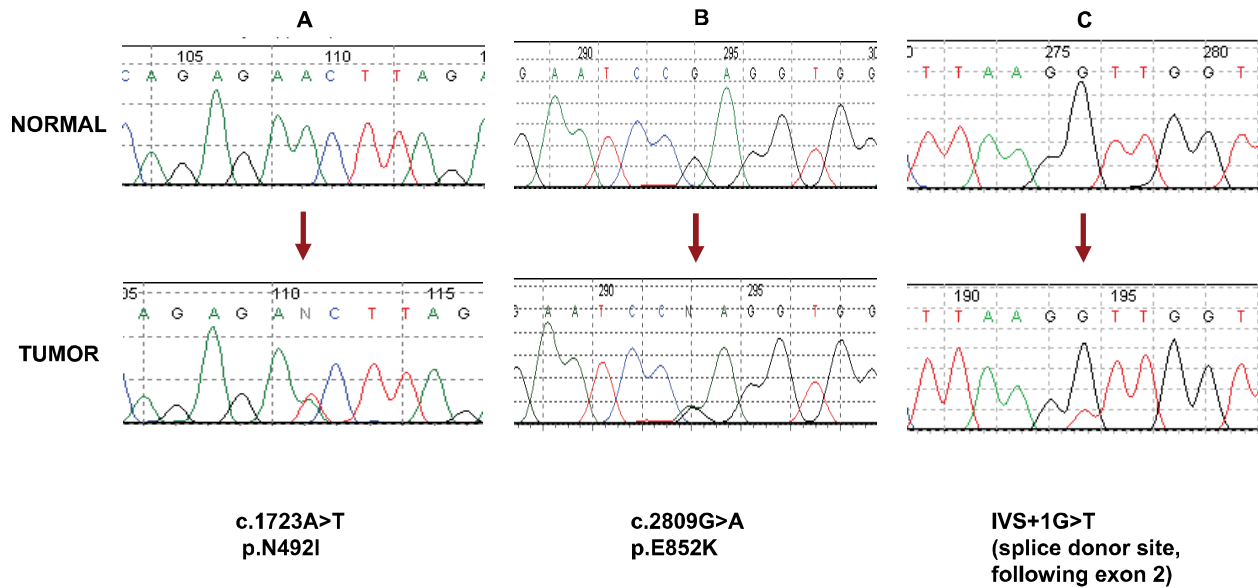**Supp. Figure S4. Somatic mutations in *PLXNC1*.**

Chromatograms of the two somatic mutations found in *PLXNC1* in two PDAC samples (A and B). In both, the lower chromatogram belongs to a tumor sample, and the upper chromatogram is from the matched normal. Arrows indicate the location of missense somatic mutations, and the nucleotide and amino acid alterations can be found below each chromatogram pair.

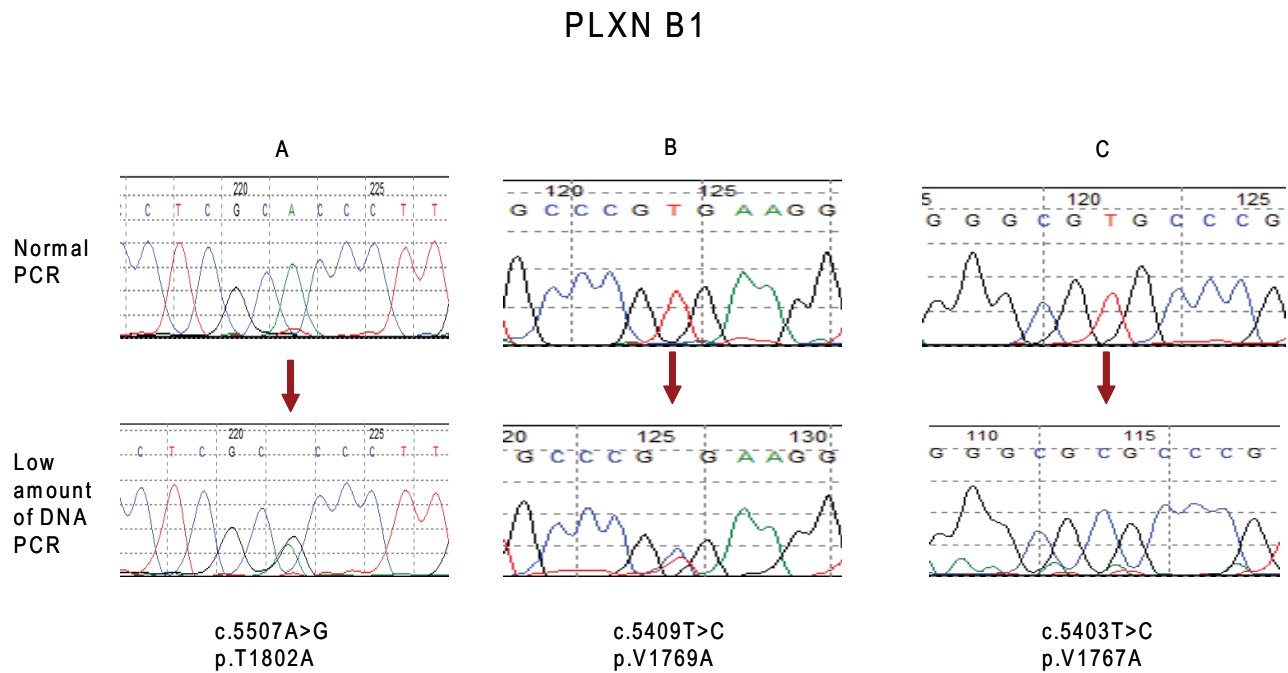

**Supp. Figure S5. Direct sequencing of low amounts of DNA may reveal artificial mutations.**

Chromatograms of three changes (A, B and C) identified in *PLXNB1* in three different prostate cancer samples. In each case, the upper chromatogram belongs to the PCR performed with normal quantity DNA (10ng/10ul reaction), and the lower chromatogram is derived from repeating the same PCR in the same sample but with a lower DNA input (2-5 ng/10ul reaction) showing PCR artifact mutations. p.T1802A mutation is one of those detected by Wong and coworkers (Wong et al., 2004). Arrows indicate the location of the artificial mutations, and the nucleotide and amino acid alterations are indicated below the traces. Numbers above the sequences are part of the software output.

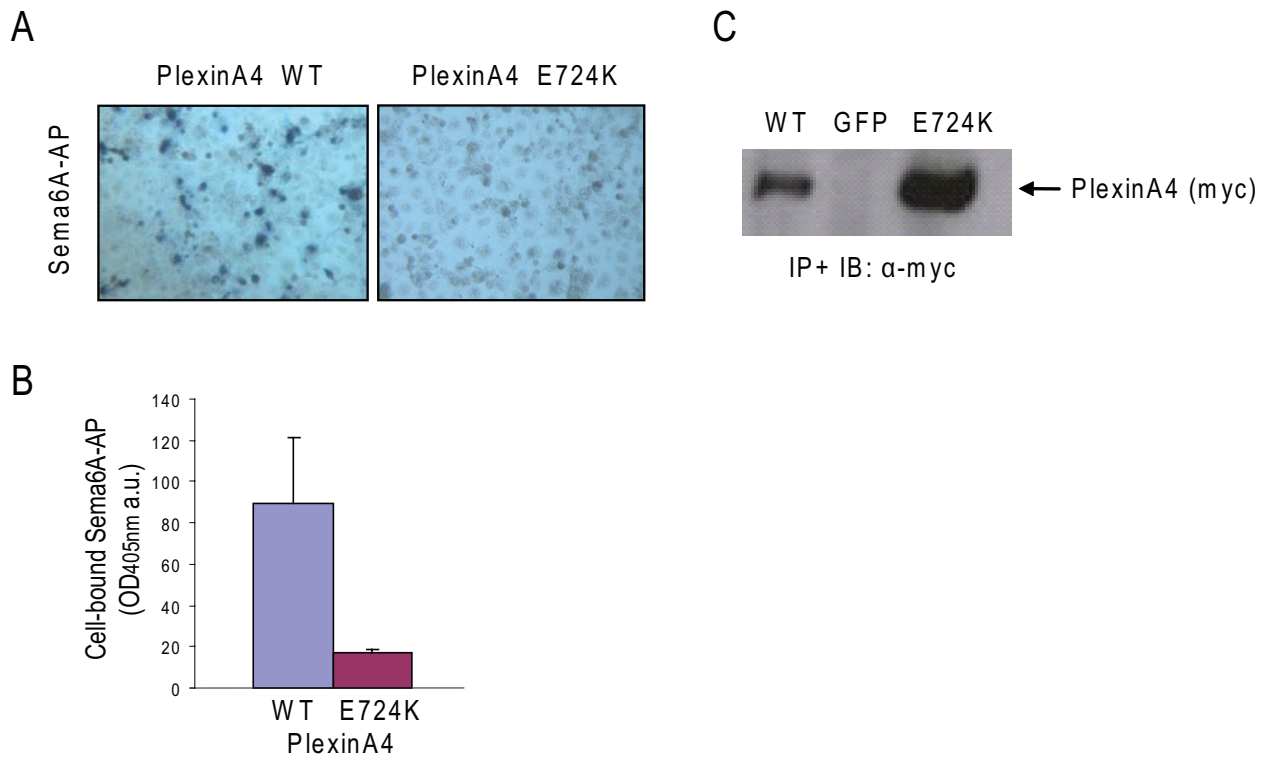

**Supp. Figure S6. PLXNA4 p.E1154K mutation impairs ligand binding ability of the receptor.**

A, the functional impact of mutation p.E1154K in the extracellular domain of PLXNA4 was assessed in COS cells (see above Methods for details) by challenging the receptor with a soluble form of the specific ligand Sema6A fused to alkaline phosphatase (Sema6A-AP), as previously shown (Suto et al., 2005). Note that, as expected, the ligand also induced a “collapsing” response in cells expressing the WT receptor. B, in order to further quantify ligand binding to receptor-expressing cells, we incubated with the soluble chromogenic AP substrate pNPP, and measured absorbance at 405 nm (see Artigiani et al., 2004 for reference). C, the comparable expression of the WT and mutated receptor proteins in the cells used for the above binding assays was confirmed by Western blotting.

**Cited References:**

- Artigiani S, Conrotto P, Fazzari P, Gilestro GF, Barberis D, Giordano S, Comoglio PM, Tamagnone L. 2004. Plexin-B3 is a functional receptor for semaphorin 5A. *EMBO Rep* 5:710-714.
- Barberis D, Artigiani S, Casazza A, Corso S, Giordano S, Love CA, Jones EY, Comoglio PM, Tamagnone L. 2004. Plexin signaling hampers integrin-based adhesion, leading to Rho-kinase independent cell rounding, and inhibiting lamellipodia extension and cell motility. *Faseb J* 18:592-594.
- Livak KJ and Schmittgen TD. 2001. Analysis of relative gene expression data using real-time quantitative PCR and the 2(-Delta Delta C(T)) Method. *Methods* 25:402-408.
- Oinuma I, Katoh H, Negishi M. 2004. Molecular dissection of the semaphorin 4D receptor plexin-B1-stimulated R-Ras GTPase-activating protein activity and neurite remodeling in hippocampal neurons. *J Neurosci* 24:11473-11480.
- Suto F, Ito K, Uemura M, Shimizu M, Shinkawa Y, Sanbo M, Shinoda T, Tsuboi M, Takashima S, Yagi T, Fujisawa H. 2005. Plexin-A4 mediates axon-repulsive activities of both secreted and transmembrane semaphorins and plays roles in nerve fiber guidance. *J Neurosci* 25:3628-37.
- Takahashi T, Strittmatter SM. 2001. PlexinA1 autoinhibition by the plexin sema domain. *Neuron* 29:429-439.
- Takano T, Ohe Y, Sakamoto H, Tsuta K, Matsuno Y, Tateishi U, Yamamoto S, Nokihara H, Yamamoto N, Sekine I, Kunitoh H, Shibata T, Sakiyama T, Yoshida T, Tamura T. 2005. Epidermal growth factor receptor gene mutations and increased copy numbers predict gefitinib sensitivity in patients with recurrent non-small-cell lung cancer. *J Clin Oncol* 23:6829-6837.
- Tamagnone L, Artigiani S, Chen H, He Z, Ming GI, Song H, Chedotal A, Winberg ML, Goodman CS, Poo M, Tessier-Lavigne M, Comoglio PM. 1999. Plexins are a large family of receptors for transmembrane, secreted, and GPI-anchored semaphorins in vertebrates. *Cell* 99:71-80.
- Wong OG, Nitkunan T, Oinuma I, Zhou C, Blanc V, Brown RS, Bott SR, Nariculam J, Box G, Munson P, Constantinou J, Feneley MR, Klocker H, Eccles SA, Negishi M, Freeman A, Masters JR, Williamson M. 2007. Plexin-B1 mutations in prostate cancer. *Proc Natl Acad Sci U S A* 104:19040-19045.
